# Supplementary material for: Clinically relevant atovaquone-resistant human malaria parasites fail to transmit by mosquito
Source: PubMed Central journal article supplement (PMC10570281; doi:10.1038/s41467-023-42030-x), 2023-10-12
Supplement: 41467_2023_42030_MOESM3_ESM.pdf [file 41467_2023_42030_MOESM3_ESM.pdf]

### Description of Additional Supplementary Files

File Name: Supplementary Data 1

Description: Variants in whole genome sequence of *P. falciparum* Y268S cell line when compared to reference *P. falciparum* NF54 genome in PlasmoDB. VarQual Score =  $-10 \log_{10} P$ , where P is the probability of an incorrect base call.
